# Supplementary material for: What do you mean by “palliative sedation”? Pre-explicative analyses as preliminary steps towards better definitions
Source: PubMed Central journal article supplement (PMC7513316; doi:10.1186/s12904-020-00635-9), 2020-09-23
Supplement: 12904_2020_635_MOESM1_ESM.pdf [file 12904_2020_635_MOESM1_ESM.pdf]

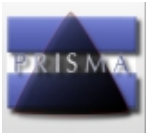

# PRISMA 2009 Flow Diagram

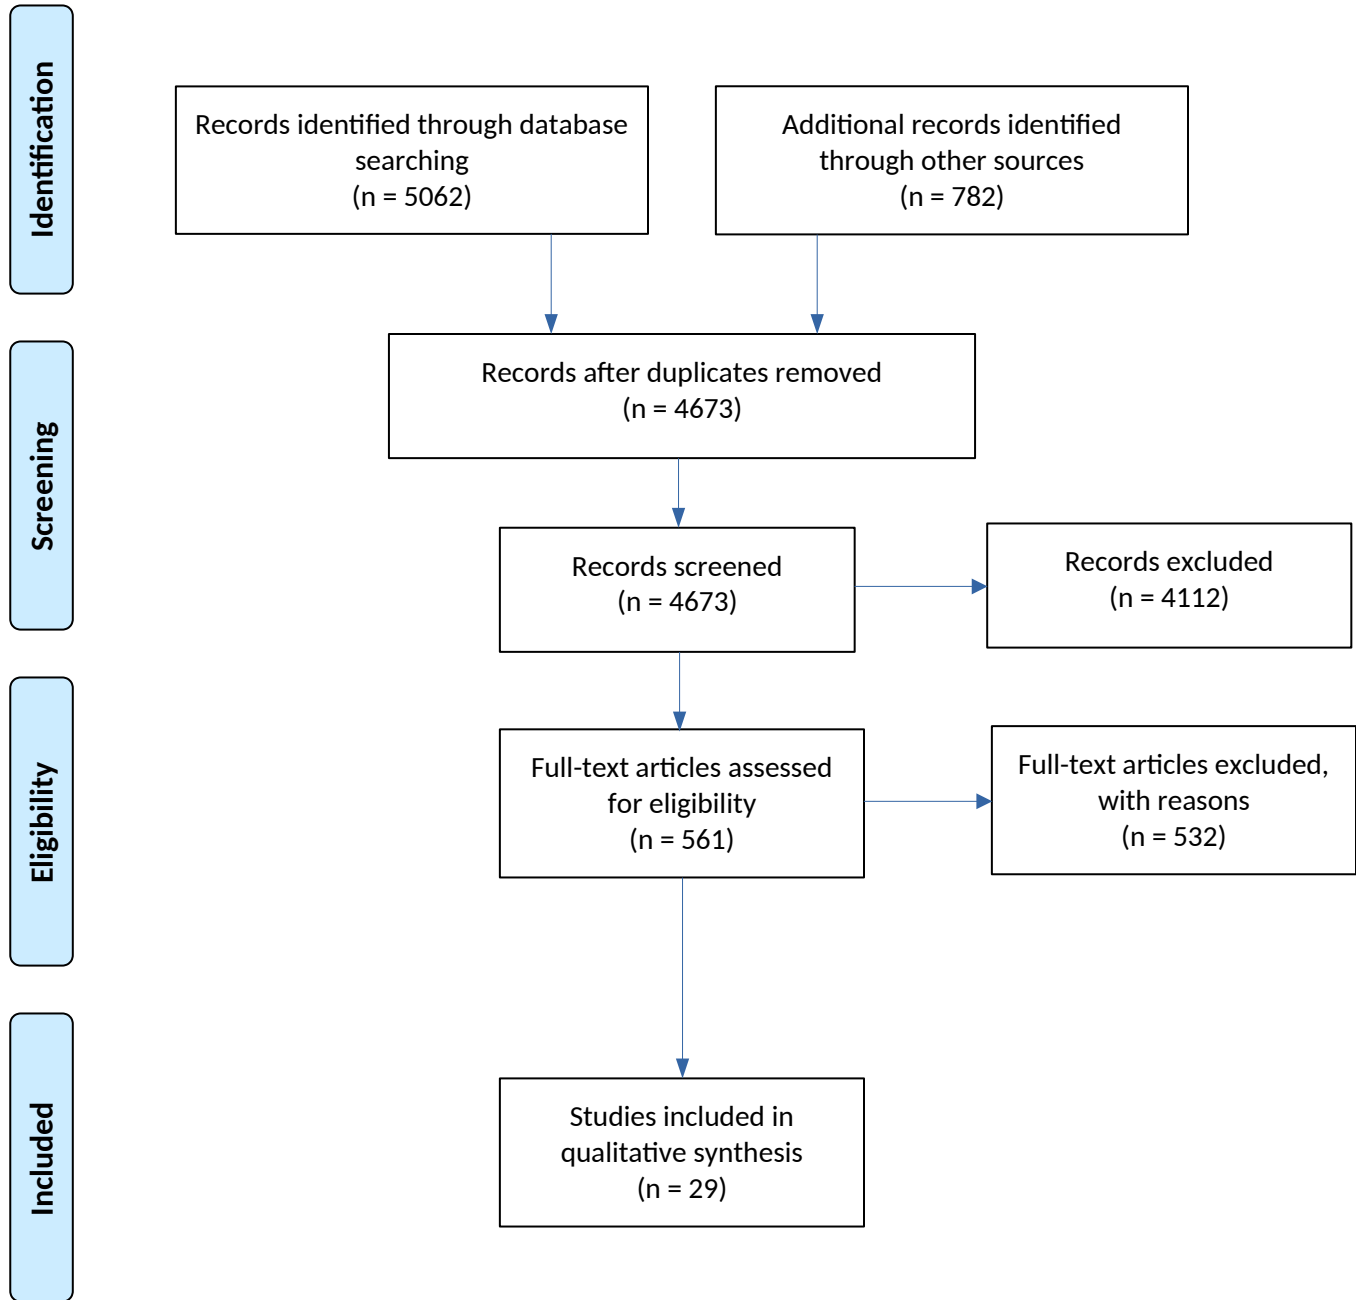

From: Moher D, Liberati A, Tetzlaff J, Altman DG, The PRISMA Group (2009). Preferred Reporting Items for Systematic Reviews and Meta-Analyses: The PRISMA Statement. PLoS Med 6(7): e1000097. doi:10.1371/journal.pmed1000097

For more information, visit [www.prisma-statement.org](http://www.prisma-statement.org).
