# Supplementary material for: What do you mean by “palliative sedation”? Pre-explicative analyses as preliminary steps towards better definitions
Source: PubMed Central journal article supplement (PMC7513316; doi:10.1186/s12904-020-00635-9), 2020-09-23
Supplement: 12904_2020_635_MOESM3_ESM.pdf [file 12904_2020_635_MOESM3_ESM.pdf]

Extracted definitions with deconstruction of content, sorted by year of publication (\* = our translation)

| Guideline                                                                                            | Definition                                                                                                                                                                                                                                                                                                                                                                                                                                                                                                                                                                                                        | Action                                                                                                                                                     | Intended path of action                                                                                                                                       | Intention (purpose)                                                                                                                                                                                                                                  | Unintended consequence                   | Means                                                                                                                                                                                     | Object                                                                            | Moral property                                                                                                                                                        |
|------------------------------------------------------------------------------------------------------|-------------------------------------------------------------------------------------------------------------------------------------------------------------------------------------------------------------------------------------------------------------------------------------------------------------------------------------------------------------------------------------------------------------------------------------------------------------------------------------------------------------------------------------------------------------------------------------------------------------------|------------------------------------------------------------------------------------------------------------------------------------------------------------|---------------------------------------------------------------------------------------------------------------------------------------------------------------|------------------------------------------------------------------------------------------------------------------------------------------------------------------------------------------------------------------------------------------------------|------------------------------------------|-------------------------------------------------------------------------------------------------------------------------------------------------------------------------------------------|-----------------------------------------------------------------------------------|-----------------------------------------------------------------------------------------------------------------------------------------------------------------------|
| Waterloo Wellington Local Health Integration Network (Canada) [24], 2019                             | "Palliative Sedation Therapy (PST) is the intentional induction and continuous maintenance of a reduced level of consciousness to relieve a patient's refractory symptom(s) during their last days and weeks of life."                                                                                                                                                                                                                                                                                                                                                                                            | intentional induction and continuous maintenance of a reduced level of consciousness                                                                       |                                                                                                                                                               | relieve refractory symptoms                                                                                                                                                                                                                          |                                          |                                                                                                                                                                                           | patients in their last days and weeks of life                                     |                                                                                                                                                                       |
| French National Authority for Health (France) [25], 2018                                             | "Palliative sedation seeks, through use of medicines, to reduce alertness, which can lead to loss of awareness. Its goal is to reduce or eliminate the perception of a situation seen as intolerable by the patient, when all the other means available and suitable for the situation have been proposed and/or implemented, without providing the expected relief. The sedation can be intermittent, transient or continuous."                                                                                                                                                                                  | use of medications                                                                                                                                         | reduce alertness (which can lead to loss or awareness and which can be intermittent, transient or continuous)                                                 | reduce or eliminate the perception of a patient, when all the other means available and suitable for the situation have been proposed and/or implemented, without providing the expected relief                                                      |                                          | medicines                                                                                                                                                                                 | patients perceiving a situation as intolerable                                    |                                                                                                                                                                       |
| Alberta Health Services (Canada) [26], 2018                                                          | "For the purpose of this Clinical Knowledge Topic (CKT), palliative sedation is the process of inducing and maintaining deep sleep, in the final hours to days of life, for the relief of severe suffering caused by one or more intractable symptoms when all appropriate alternative interventions have failed to bring adequate symptom relief."                                                                                                                                                                                                                                                               | inducing and maintaining deep sleep                                                                                                                        |                                                                                                                                                               | the relief of severe suffering caused by one or more intractable symptoms when all appropriate alternative interventions have failed to bring adequate symptom relief                                                                                |                                          |                                                                                                                                                                                           | in the final hours to days of life                                                |                                                                                                                                                                       |
| Champlain Hospice Palliative Care Program (USA) [27], 2018                                           | "Palliative sedation therapy: [then quote of the EAPC definition]."                                                                                                                                                                                                                                                                                                                                                                                                                                                                                                                                               | (see EAPC)                                                                                                                                                 | (see EAPC)                                                                                                                                                    | (see EAPC)                                                                                                                                                                                                                                           |                                          | (see EAPC)                                                                                                                                                                                |                                                                                   | (see EAPC)                                                                                                                                                            |
| Winnipeg Regional Health Authority (Canada) [28], 2017                                               | "Sedation for Palliative Purposes is the planned and proportionate use of sedation to reduce consciousness in an imminently dying patient with the goal to relieve suffering that is intolerable to the patient and refractory to interventions that are acceptable to the patient."                                                                                                                                                                                                                                                                                                                              | planned and proportionate use of sedation                                                                                                                  | reduce consciousness                                                                                                                                          | relieve suffering that is intolerable to the patient and refractory to interventions that are acceptable to the patient                                                                                                                              |                                          |                                                                                                                                                                                           | imminently dying                                                                  |                                                                                                                                                                       |
| British Columbia Centre for Palliative Care (Canada) [29], 2017                                      | "Palliative Sedation Therapy (PST): The monitored use of pharmacological agent(s) to intentionally reduce consciousness to treat refractory, intractable and intolerable symptoms for a patient at end of life with advanced life-limiting, progressive illness."                                                                                                                                                                                                                                                                                                                                                 | monitored use of pharmacological agents                                                                                                                    | intentional reduction of consciousness                                                                                                                        | treat refractory, intractable and intolerable symptoms                                                                                                                                                                                               |                                          | pharmacological agents                                                                                                                                                                    | patients at the end of life with advanced life-limiting, progressive illness      |                                                                                                                                                                       |
| The Australian and New Zealand Society of Palliative Medicine (Australia and New Zealand) [30], 2017 | "Palliative Sedation Therapy (PST) is the monitored use of medications to lower a patient's awareness in order to provide relief of symptoms that are refractory to usual measures, are distressing and result in considerable suffering if unrelieved [.]"                                                                                                                                                                                                                                                                                                                                                       | monitored use of medications                                                                                                                               | lower a patient's consciousness                                                                                                                               | relief of symptoms that are refractory to usual measures, distressing and result in considerable suffering if unrelieved                                                                                                                             |                                          | medications                                                                                                                                                                               |                                                                                   |                                                                                                                                                                       |
| Austrian Palliative Society (Austria) [31], 2017*                                                    | In the context of palliative medicine, therapeutic (or palliative) sedation is understood as the monitored use of medications with the aim of reducing or eliminating the state of consciousness (unconsciousness), in order to relieve the burden of symptoms in an otherwise refractory situation in a manner that is ethically acceptable to the patients, relatives and health-care providers.                                                                                                                                                                                                                | the monitored use of medications                                                                                                                           | reduced or eliminated state of consciousness (unconsciousness)                                                                                                | relief the burden of symptoms in an otherwise refractory situation                                                                                                                                                                                   |                                          | medications                                                                                                                                                                               |                                                                                   | in a manner that ethically acceptable to the patients, relatives and health-care providers                                                                            |
| Quebec society of doctors of palliative care (Canada) [32], 2016                                     | "Palliative sedation" is defined as the use of sedative medications to relieve refractory symptoms by a reduction in consciousness."                                                                                                                                                                                                                                                                                                                                                                                                                                                                              | use of sedative medications                                                                                                                                | reduction in consciousness                                                                                                                                    | relieve refractory symptoms                                                                                                                                                                                                                          |                                          | sedative medications                                                                                                                                                                      |                                                                                   |                                                                                                                                                                       |
| University of California, Los Angeles Hospital System (USA) [33], 2015                               | "Palliative Sedation is the controlled administration of medications whose primary or secondary effect is to bring about a reduction in patient consciousness, in order to alleviate or at least render tolerable symptoms that have been refractory to standard comprehensive interventions."                                                                                                                                                                                                                                                                                                                    | controlled administration of medications...                                                                                                                |                                                                                                                                                               | alleviate or at least render tolerable symptoms that have been refractory to standard comprehensive interventions                                                                                                                                    |                                          | medications whose primary or secondary effect is to bring about a reduction in patient consciousness                                                                                      |                                                                                   |                                                                                                                                                                       |
| Alberta Health Services, Edmonton Zone Palliative Care Program (Canada) [34], 2015                   | "Palliative Sedation is a process of inducing and maintaining deep sleep in order to relieve refractory symptoms in patients with an anticipated life expectancy of hours to days [.]"                                                                                                                                                                                                                                                                                                                                                                                                                            | inducing and maintaining deep sleep                                                                                                                        |                                                                                                                                                               | relieve refractory symptoms                                                                                                                                                                                                                          |                                          |                                                                                                                                                                                           | patients with an anticipated life expectancy of hours to days                     |                                                                                                                                                                       |
| The Norwegian Medical Association (Norway) [35], 2014                                                | "By palliative sedation is meant pharmacological depression of the level of consciousness in order to alleviate suffering that cannot be relieved in any other way."                                                                                                                                                                                                                                                                                                                                                                                                                                              | pharmacological depression of the level of consciousness                                                                                                   |                                                                                                                                                               | alleviate suffering that cannot be relieved in any other way                                                                                                                                                                                         |                                          | pharmaceuticals                                                                                                                                                                           |                                                                                   |                                                                                                                                                                       |
| European Society for Medical Oncology Guidelines Working Group (Europe) [46], 2014                   | "Palliative sedation is a measure of last resort used at the end of life to relieve severe and refractory symptoms. It is carried out by the administration of sedative medications in supervised settings and is aimed at inducing a state of decreased awareness or absent awareness (unconsciousness). The intent of palliative sedation is to relieve the burden of otherwise intolerable suffering for terminally ill patients and to do so in such a manner so as to preserve the moral sensibilities of the patient, medical professionals involved in his or her care, and concerned family and friends." | administration of sedative medications (in supervised settings)                                                                                            | inducing a state of decreased or absent awareness                                                                                                             | relieve the burden of otherwise intolerable suffering                                                                                                                                                                                                |                                          | sedative medications                                                                                                                                                                      | terminally ill patients                                                           | carried out in a manner so as to preserve the moral sensibilities of the patient, medical professionals involved in his or her care, and concerned family and friends |
| Spanish Medical Colleges Organization and Spanish Society for Palliative Care, Spain [47], 2012*     | Palliative sedation is the deliberate reduction of consciousness of a sick person by administering medications appropriate for the purpose of avoiding an intense suffering caused by one or more refractory symptoms. It can be carried out continuously or intermittently and with a depth adjusted to achieve the minimal level of sedation in order to relieve the symptom.                                                                                                                                                                                                                                   | administering medications                                                                                                                                  |                                                                                                                                                               |                                                                                                                                                                                                                                                      |                                          | medications appropriate for the purpose of avoiding an intense suffering caused by one or more refractory symptoms                                                                        |                                                                                   |                                                                                                                                                                       |
| Canadian Society of Palliative Care Physicians (CSPCP) Taskforce, Canada [38], 2012                  | "Many definitions have been put forward for various types of sedation used in palliative practice, but at the core they share the ideas that palliative sedation is: 1) the use of (a) pharmacological agent(s) to reduce consciousness; 2) reserved for treatment of intolerable and refractory symptoms; and 3) only considered in a patient who has been diagnosed with an advanced progressive illness."                                                                                                                                                                                                      | the use of (a) pharmacological agent(s)                                                                                                                    | reduce consciousness                                                                                                                                          | treatment of intolerable and refractory symptoms                                                                                                                                                                                                     |                                          | (a) pharmacological agent(s)                                                                                                                                                              | patients diagnosed with an advanced progressive illness                           |                                                                                                                                                                       |
| Flanders Federation for Palliative Care (Belgium) [39], 2012*                                        | Definition 'palliative sedation': The administration of sedatives in dosages and combinations required to reduce the consciousness of a terminally ill patient as much as needed to control one or more refractory symptoms in an adequate manner.                                                                                                                                                                                                                                                                                                                                                                | administration of sedatives                                                                                                                                |                                                                                                                                                               |                                                                                                                                                                                                                                                      |                                          | sedatives in dosages and combinations required to reduce the consciousness of a terminally ill patient as much as needed to control one or more refractory symptoms in an adequate manner |                                                                                   |                                                                                                                                                                       |
| Irish Association for Palliative Care (Ireland) [40], 2011                                           | "[The EAPC sentence is quoted.] 'In palliative sedation, the physician intends only to relieve severe refractory suffering using sedation as a last resort. There is no intention to end the patient's life as in euthanasia and physician-assisted suicide."                                                                                                                                                                                                                                                                                                                                                     | (see EAPC)                                                                                                                                                 | (see EPAC)                                                                                                                                                    | (see EAPC)                                                                                                                                                                                                                                           | other purposes                           | (see EAPC)                                                                                                                                                                                |                                                                                   | (see EAPC)                                                                                                                                                            |
| Fraser Health Hospice Palliative Care Program (Canada) [41], 2011                                    | "Palliative Sedation Therapy (PST) (also 'Terminal Sedation', 'Controlled Sedation', 'Total Sedation', 'Deep Sedation', 'Continuous Sedation') is the intentional lowering of a patient's level of consciousness in the last days of life."                                                                                                                                                                                                                                                                                                                                                                       | intentional lowering of a patient's level of consciousness                                                                                                 |                                                                                                                                                               |                                                                                                                                                                                                                                                      |                                          |                                                                                                                                                                                           | patients in their last days of life                                               |                                                                                                                                                                       |
| National Hospice and Palliative Care Organization (USA) [42], 2010                                   | "Palliative sedation is the lowering of patient consciousness using medications for the express purpose of limiting patient awareness of suffering that is intractable and intolerable."                                                                                                                                                                                                                                                                                                                                                                                                                          | lowering of patient consciousness                                                                                                                          |                                                                                                                                                               | limiting patient awareness of suffering that is intractable and intolerable                                                                                                                                                                          |                                          | medications                                                                                                                                                                               |                                                                                   |                                                                                                                                                                       |
| Swedish Medical Association (Sweden) [43], 2010*                                                     | "In this context, palliative sedation means the deliberate lowering of a patient's consciousness at the end of life with the purpose to achieve a relief from intractable symptoms. The treatment presupposes that the expected lifespan is very short, usually one to two weeks. The intention of palliative sedation is neither to shorten nor to prolong the dying process."                                                                                                                                                                                                                                   | deliberate lowering of a patient's consciousness                                                                                                           |                                                                                                                                                               | relief from intractable symptoms                                                                                                                                                                                                                     | neither shorten or prolong dying process |                                                                                                                                                                                           | patients at the end of life with very limited lifespan (usually one to two weeks) |                                                                                                                                                                       |
| European Association for Palliative Care (Europe) [15], 2009                                         | "Therapeutic (or palliative) sedation in the context of palliative medicine is the monitored use of medications intended to induce a state of decreased or absent awareness (unconsciousness) in order to relieve the burden of otherwise intractable suffering in a manner that is ethically acceptable to the patient, family and health-care providers."                                                                                                                                                                                                                                                       | monitored use of medications                                                                                                                               | induce a state of decreased or absent awareness (unconsciousness)                                                                                             | relieve the burden of otherwise intractable suffering                                                                                                                                                                                                |                                          | medications                                                                                                                                                                               |                                                                                   | carried out in a manner that is ethically acceptable to the patient, family and health-care providers                                                                 |
| Royal Dutch Medical Association (The Netherlands) [44], 2009                                         | "Palliative sedation is defined by the committee as: The deliberate lowering of a patient's level of consciousness in the last stages of life."                                                                                                                                                                                                                                                                                                                                                                                                                                                                   | the deliberate lowering of a patient's level of consciousness                                                                                              |                                                                                                                                                               |                                                                                                                                                                                                                                                      |                                          |                                                                                                                                                                                           | patients in the last stages of life                                               |                                                                                                                                                                       |
| French Society of Support and Palliative Care (France) [45], 2009*                                   | Definition of sedation: Sedation is the attempt to reduce vigilance which can go as far as to the loss of consciousness. The goal is to reduce or remove the perception of a situation that is experienced as unbearable by a patient, after all means available and adequate in this situation have been proposed and/or administered without giving the desired alleviation. Sedation (...) can be applied intermittently, transiently or continuously.                                                                                                                                                         | the attempt to reduce vigilance (which can go as far as to the loss of consciousness and which can be applied intermittently, transiently or continuously) |                                                                                                                                                               | reduce or remove the perception of a situation (after all means available and adequate in this situation have been proposed and/or administered without giving the desired alleviation)                                                              |                                          |                                                                                                                                                                                           | patients experiencing their situation as unbearable                               |                                                                                                                                                                       |
| Veterans Health Administration (USA) [46], 2007                                                      | "For purposes of this analysis, the NEC defines palliative sedation as: The administration of nonopioid drugs to sedate a terminally ill patient to unconsciousness as an intervention of last resort to treat severe, refractory pain or other clinical symptoms that have not been relieved by aggressive, symptom-specific palliation."                                                                                                                                                                                                                                                                        | the administration of nonopioid drugs                                                                                                                      | sedate to unconsciousness                                                                                                                                     | treat severe, refractory pain or other clinical symptoms that have not been relieved by aggressive, symptom-specific palliation (i.e. as a last resort)                                                                                              |                                          | nonopioid drugs                                                                                                                                                                           | terminally ill patients                                                           |                                                                                                                                                                       |
| Italian Society of Palliative Care (Italy) [47], 2007*                                               | For terminal/palliative sedation so far there has been the agreement: 'The intentional reduction of consciousness by pharmacological means until loss of consciousness for the purpose of reducing or abolishing the perception of a symptom otherwise intolerable for the patient, despite the use of adequate means to control the symptom, that thus remained refractory.' [...] In this document, the term terminal/palliative sedation is reserved to [...] the final phase of life.                                                                                                                         | the intentional reduction of consciousness until loss of consciousness                                                                                     |                                                                                                                                                               | reducing or abolishing the perception of a symptom otherwise intolerable for the patient, despite the use of adequate means to control the symptom, that thus remained refractory                                                                    |                                          |                                                                                                                                                                                           | patients in the final phase of life                                               |                                                                                                                                                                       |
| Italian Society of Neurology (Italy) [48], 2007                                                      | "By 'palliative sedation', we mean an intentional reduction of vigilance by pharmacological means up to the point of the complete loss of consciousness with the aim of reducing or abolishing the perception of a symptom that would otherwise be intolerable for the patient despite the implementation of the most adequate means aimed at controlling the symptom itself, which is therefore to be considered refractory.[.]"                                                                                                                                                                                 | intentional reduction of vigilance up to the point of the complete loss of consciousness                                                                   |                                                                                                                                                               | reducing or abolishing the perception of a symptom that would otherwise be intolerable for the patient despite the implementation of the most adequate means aimed at controlling the symptom itself, which is therefore to be considered refractory |                                          |                                                                                                                                                                                           |                                                                                   |                                                                                                                                                                       |
| Swiss Society for Palliative Medicine, Care and (Switzerland) [49], 2005*                            | Definition of palliative sedation: Deliberate administration of sedating medications, in the smallest effective dosage, in close collaboration with a competent interdisciplinary team, to sustainably relieve (easily evaluable goals have to be formulated), one or more refractory symptoms, of a patient with an advanced illness and limited life expectancy (days, weeks), by permanently or temporarily reducing the patient's consciousness.                                                                                                                                                              | deliberate administration of medications in close collaboration with a competent interdisciplinary team                                                    | reducing the patient's consciousness permanently or temporarily                                                                                               | relieve one or more refractory symptoms sustainably                                                                                                                                                                                                  |                                          | sedating medications, in the smallest effective dosage                                                                                                                                    |                                                                                   |                                                                                                                                                                       |
| Japanese Society for Palliative Care (Japan) [50], 2005                                              | "Palliative sedation therapy is defined as (1) the use of sedative medications to relieve suffering by the reduction in patient consciousness level or (2) intentional maintenance of reduction in patient consciousness level resulting from symptomatic treatments."                                                                                                                                                                                                                                                                                                                                            | use of sedative medications                                                                                                                                | (1) reduction in patient consciousness level or (2) intentional maintenance of reduction in patient consciousness level resulting from symptomatic treatments | relieve suffering                                                                                                                                                                                                                                    |                                          | [for (1):] sedative medications                                                                                                                                                           |                                                                                   |                                                                                                                                                                       |
| Hospice & Palliative Care Federation of Massachusetts (USA) [51], 2004                               | "Palliative Sedation is the monitored use of medications (sedatives, barbiturates, neuroleptics, hypnotics, benzodiazepines, and/or psychosocial distress for patients with a terminal diagnosis, by inducing varied degrees of unconsciousness. The purpose of the medication(s) is to provide comfort and relieve suffering and not to hasten death."                                                                                                                                                                                                                                                           | monitored use of medications                                                                                                                               | varied degrees of unconsciousness                                                                                                                             | relieve refractory and unendurable physical, spiritual, and/or psychosocial distress                                                                                                                                                                 | hastening death                          | medications (sedatives, barbiturates, neuroleptics, hypnotics, benzodiazepines or anesthetic medication)                                                                                  | patients with a terminal diagnosis                                                |                                                                                                                                                                       |
